# Supplementary material
Source: publisher figshare collection journal article supplement (https://asha.figshare.com/articles/dataset/_/21291405)
Supplement: Supplementary file 1 [file 1]

**Supplemental Material S1.** Methodological quality indicators in the ASHA levels of evidence scheme.

| Indicator                          | Description of Quality Indicator                                                                                                                                                    |
|------------------------------------|-------------------------------------------------------------------------------------------------------------------------------------------------------------------------------------|
| Study Design                       | Single participant discovery research, retrospective case control, or controlled trial.                                                                                             |
| Blinding                           | Blinding procedures utilized as part of the study design.                                                                                                                           |
| Sampling                           | Process used to choose and assign participants to groups was random and adequately described.                                                                                       |
| Group or participant comparability | Participants were similar at baseline on important factors (between-subject design) or were described adequately (within-subject design).                                           |
| Treatment Fidelity                 | Evidence that treatment was delivered as intended.                                                                                                                                  |
| Outcomes                           | At least one primary outcome measure was both reliable and valid.                                                                                                                   |
| Statistical Significance           | A reported or calculable <i>p</i> value.                                                                                                                                            |
| Precision                          | Effect size and confidence interval reported or calculable.                                                                                                                         |
| Intention-to-treat                 | Participants' data are analyzed according to the group to which they were initially assigned or if the number of participants at pre-treatment remained the same at post-treatment. |

*Note.* Chart identifies highest level of quality needed to achieve 1 point.  
Based on Mullens, 2007, and adapted from Cherney et al., 2008.

**References**

- Cherney, L. R., Patterson, J. P., Raymer, A., Frymark, T., & Schooling, T. (2008). Evidence-based systematic review: Effects of intensity of treatment and constraint-induced language therapy for individuals with stroke-induced aphasia. *Journal of Speech, Language, and Hearing Research*, 51, 1282-1299. [https://doi.org/10.1044/1092-4388\(2008/07-0206\)](https://doi.org/10.1044/1092-4388(2008/07-0206))
- Mullen, R. (2007). The state of the evidence: ASHA develops levels of evidence for communication sciences and disorders. *ASHA Leader*, 12(3), 24–25. <https://doi.org/10.1044/leader.FTR4.12032007.8>
