# Supplementary material
Source: publisher figshare collection journal article supplement (https://asha.figshare.com/articles/dataset/_/21291405)
Supplement: Supplementary file 3 [file 1]

**Supplemental Material S3.** Study quality ratings using the ASHA levels of evidence scheme.

| Reference                                       | Study Design | Blinding | Sampling | Group/Participant Similarity | Treatment Fidelity | Outcomes | Statistical Significance | Precision | Intention to Treat | Total Score |
|-------------------------------------------------|--------------|----------|----------|------------------------------|--------------------|----------|--------------------------|-----------|--------------------|-------------|
| Alpert, C. L., & Kaiser, A. P. (1992)           | 1            | 0        | 0        | 1                            | 0                  | 1        | 0                        | 0         | NA                 | 3           |
| Alt, M., et al. (2014)                          | 1            | 0        | 0        | 1                            | 1                  | 1        | 0                        | 0         | NA                 | 4           |
| Best, W., et al. (1993)                         | 1            | 1        | 1        | 1                            | 0                  | 1        | 1                        | 0         | 1                  | 7           |
| Brand Robertson, S., & Ellis Weismer, S. (1999) | 1            | 0        | 1        | 1                            | 1                  | 1        | 1                        | 1         | 1                  | 8           |
| Buschmann, A., et al. (2009)                    | 1            | 1        | 1        | 1                            | 0                  | 1        | 1                        | 1         | 0                  | 7           |
| Ciccone, N., et al. (2012)                      | 0            | 0        | 0        | 1                            | 0                  | 1        | 1                        | 1         | NA                 | 5           |
| Craig-Unkefer, L. A., & Kaiser, A. P. (2003)    | 1            | 0        | 0        | 1                            | 1                  | 1        | 0                        | 0         | NA                 | 4           |
| Crowe, K. L., et al. (2004)                     | 1            | 0        | 1        | 1                            | 1                  | 1        | 1                        | 0         | NA                 | 6           |
| Delaney, E. M., & Kaiser, A. P. (2001)          | 1            | 0        | 0        | 1                            | 1                  | 1        | 0                        | 0         | NA                 | 4           |
| DeVeney, S. L., Cress, C. J., & Reid, R. (2014) | 1            | 0        | 0        | 1                            | 1                  | 1        | 0                        | 1         | NA                 | 5           |

|                                        |   |   |   |   |   |   |   |   |    |   |
|----------------------------------------|---|---|---|---|---|---|---|---|----|---|
| Ellis Weismer, S., et al. (1993)       | 1 | 1 | 0 | 1 | 1 | 1 | 0 | 0 | NA | 5 |
| Fong, N., et al. (2012)                | 0 | 0 | 0 | 1 | 0 | 0 | 0 | 0 | NA | 1 |
| Gains, B. R., & Gaboury, I. (2004)     | 1 | 0 | 0 | 0 | 0 | 1 | 1 | 0 | NA | 3 |
| Gibbard, D., et al. (2004)             | 1 | 0 | 1 | 1 | 0 | 1 | 1 | 0 | 0  | 5 |
| Gibbard, D. (1994) Study 1             | 1 | 1 | 1 | 1 | 0 | 1 | 1 | 0 | 1  | 7 |
| Gibbard, D. (1994) Study 2             | 1 | 1 | 1 | 1 | 0 | 1 | 1 | 0 | 1  | 7 |
| Girolametto, L., et al. (1996a)        | 1 | 1 | 1 | 1 | 1 | 1 | 1 | 0 | 1  | 8 |
| Girolametto, L., et al. (1996b)        | 1 | 1 | 1 | 1 | 1 | 1 | 1 | 0 | 1  | 8 |
| Hancock et al. (2002)                  | 1 | 0 | 0 | 1 | 0 | 1 | 0 | 0 | NA | 3 |
| Hendler Lederer, S. (2001)             | 1 | 0 | 0 | 1 | 0 | 1 | 0 | 0 | NA | 3 |
| Hodge, M., & Gains, R. (2017)          | 0 | 0 | 0 | 1 | 1 | 1 | 1 | 1 | NA | 5 |
| Kwok, E. Y. L., et al. (2019)          | 1 | 0 | 0 | 1 | 0 | 1 | 1 | 0 | 0  | 4 |
| Leech, E. R. B., & Cress, C. J. (2011) | 1 | 0 | 0 | 1 | 1 | 1 | 0 | 0 | NA | 4 |

|                                        |   |   |   |   |   |   |   |   |    |   |
|----------------------------------------|---|---|---|---|---|---|---|---|----|---|
| McDade, A., & McCartan, P. (1998)      | 1 | 0 | 0 | 1 | 0 | 1 | 1 | 0 | 1  | 5 |
| McDonald, D., et al. (2019)            | 0 | 0 | 0 | 1 | 0 | 1 | 0 | 0 | NA | 2 |
| Moore, H. W. (2014)                    | 1 | 0 | 0 | 1 | 1 | 1 | 0 | 0 | 0  | 4 |
| Roberts, M. Y., & Kaiser, A. P. (2012) | 1 | 0 | 1 | 1 | 1 | 1 | 1 | 1 | 1  | 8 |
| Roberts, M. Y., & Kaiser, A. P. (2015) | 1 | 0 | 1 | 1 | 1 | 1 | 1 | 1 | 1  | 8 |
| Roberts, M. Y. et al. (2014)           | 1 | 0 | 0 | 1 | 1 | 1 | 0 | 0 | NA | 4 |
| Wake, M., et al. (2011)                | 1 | 1 | 1 | 1 | 0 | 1 | 1 | 1 | 1  | 8 |
| Warren, S. F., & Kaiser, A. P. (1986)  | 0 | 0 | 0 | 1 | 0 | 1 | 0 | 0 | NA | 2 |
| Whitehurst, G. J. (1991)               | 1 | 0 | 0 | 1 | 0 | 1 | 1 | 0 | 0  | 4 |
| Wilcox, M. J., et al. (1991)           | 1 | 0 | 1 | 1 | 0 | 1 | 1 | 0 | 1  | 6 |
| Wolfe, D. L., & Heilmann, J. (2010)    | 1 | 0 | 0 | 1 | 1 | 1 | 0 | 0 | NA | 4 |

Note. NA = not applicable.

## References

- Alpert, C. L., & Kaiser, A. P. (1992). Training parents as milieu language teachers. *Journal of Early Intervention, 16*(1), 31-52. <https://doi.org/10.1177/105381519201600104>
- Alt, M., Meyers, C., Oglivie, T., Nicholas, K., & Arizmendi, G. (2014). Cross-situational statistically-based word learning intervention for late-talking toddlers. *Journal of Communication Disorders, 52*, 207-220. <https://doi.org/10.1016/j.jcomdis.2014.07.002>
- Best, W., Melvin, D., & Williams, S. (1993). The effectiveness of communication groups in day nurseries. *European Journal of Disorders of Communication, 28*, 187-212. <https://doi.org/10.3109/13682829309041466>
- Brand Robertson, S., & Ellis Weismer, S. (1999). Effects of treatment on linguistic and social skills in toddlers with delayed language development. *Journal of Speech, Language, and Hearing Research, 42*, 1234-1248. <https://doi.org/10.1044/jslhr.4205.1234>
- Buschmann, A., Jooss, B., Rupp, A., Feldhusen, F., Pietz, J., & Philippi, H. (2009). Parent based language intervention for 2-year-old children with specific expressive language delay: A randomized controlled trial. *Archives of Disease in Childhood, 94*, 110-116. <https://doi.org/10.1136/adc.2008.141572>
- Ciccone, N., Hennessey, N., & Stokes, S. F. (2012). Community-based early intervention for language delay: A preliminary investigation. *International Journal of Language and Communication Disorders, 47*(4), 467-470. <https://doi.org/10.1111/j.1460-6984.2012.00149.x>
- Craig-Unkefer, L. A., & Kaiser, A. P. (2003). Increasing peer-directed social-communication skills of children enrolled in head start. *Journal of Early Intervention, 25*(4), 229-247. <https://doi.org/10.1177/105381510302500401>
- Crowe, L. K., Norris, J. A., & Hoffman, P. R. (2004). Training caregivers to facilitate communicative participation of preschool children with language impairment during storybook reading. *Journal of Communication Disorders, 37*, 177-196. <https://doi.org/10.1016/j.jcomdis.2003.09.001>
- Delaney, E. M., & Kaiser, A. P. (2001). The effects of teaching parents blended communication and behavior support strategies. *Behavioral Disorders, 26*(2), 93-116. <https://doi.org/10.1177/019874290102600201>

- DeVeney, S. L., Cress, C. J., & Reid, R. (2014). Comparison of two word learning techniques and the effect of neighborhood density for late talkers. *Communication Disorders Quarterly*, 35(3), 133-145. <https://doi.org/10.1177/1525740113516788>
- Ellis Weismer, S. Murray-Branch, J., & Miller, J. F. (1993). Comparison of two methods for promoting productive vocabulary in late talkers. *Journal of Speech, Language, and Hearing Research*, 36(5), 1037-1050. <https://doi.org/10.1044/jshr.3605.1037>
- Fong, N., Ho, S., So, B., & Lian, W. (2012). Evaluation of the Hanen It Takes Two to Talk intervention programme. *Proceedings of Singapore Healthcare*, 21(4), 251-256. <https://doi.org/10.1177/201010581202100406>
- Gains, B. R., & Gaboury, I. (2004). Toddler talk: Outcomes from a parent-focused intervention for children with speech/language problems. *Journal of Speech-Language Pathology and Audiology*, 28(4), 173-183.
- Gibbard, D. (1994). Parent-based intervention with pre-school language-delayed children. *European Journal of Disorders of Communication*, 29(2), 131-150. <https://doi.org/10.3109/13682829409041488>
- Gibbard, D., Cogan, L., & MacDonald, J. (2004). Cost-effectiveness analysis of current practice and parent intervention for children under 3 years presenting with expressive language delay. *International Journal of Language and Communication Disorders*, 39(2), 229-244. <https://doi.org/10.1080/13682820310001618839>
- Girolametto, L., Steig Pearce, P., & Weitzman, E. (1996a). Interactive focused stimulation for toddlers with expressive vocabulary delays. *Journal of Speech and Hearing Research*, 39, 1274-1283. <https://doi.org/10.1044/jshr.3906.1274>
- Girolametto, L., Steig Pearce, P., & Weitzman, E. (1996b). The effects of focused stimulation for promoting vocabulary in young children with delays: A pilot study. *Journal of Children's Communication Development*, 17(2), 39-49. <https://doi.org/10.1177/152574019501700205>
- Hancock, T. B., Kaiser, A. P., & Delaney, E. M. (2002). Teaching parents of preschoolers at high risk: Strategies to support language and positive behavior. *Topics in Early Childhood Special Education*, 22(4), 191-212. <https://doi.org/10.1177/027112140202200402>

Hendler Lederer, S. (2001). Efficacy of parent-child language group intervention for late talking toddlers. *Infant-Toddler Intervention*, 11(3-4), 223-235.

Hodge, M., & Gaines, R. (2017). Pilot implementation of an alternative service delivery model for young children with severe speech and expressive language delay.

*Canadian Journal of Speech-Language and Audiology*, 41(1), 34-57.

Kwok, E. Y. L., Cunningham, B. J., & Oram Cardy, J. (2019). Effectiveness of a parent implemented language intervention for late-to-talk children: A real-world retrospective clinical chart review. *International Journal of Speech-Language Pathology*, 1, 1-11. <https://doi.org/10.1080/17549507.2019.1584643>

Leech, E. R. B., & Cress, C. J. (2011). Indirect Facilitation of Speech in a Late Talking Child by Prompted Production of Picture Symbols or Signs. *Augmentative and Alternative Communication*, 27(1), 40-52. <https://doi.org/10.3109/07434618.2010.550062>

McDade, A., & McCartan, P. (1998). Partnership with parents: A pilot project. *International Journal of Language and Communication Disorders*, 33, 556-561.

<https://doi.org/10.3109/13682829809179485>

McDonald, D., Colmer, S., Guest, S., Humber, D., Ward, C., & Young, J. (2019). Parent implemented language intervention delivered by therapy assistants for two-year olds at risk of language difficulties: A case series. *Child Language Teaching and Therapy*, 35(2), 113-124. <https://doi.org/10.1177/0265659019842244>

Moore, H. W., Barton, E. E., & Chironis, M. (2014). A program for improving toddler communication through parent coaching. *Topics in Early Childhood Special Education*, 33(4), 212-224. <https://doi.org/10.1177/0271121413497520>

Roberts, M. Y., & Kaiser, A. P. (2012). Assessing the effects of a parent-implemented language intervention for children with language impairments using empirical benchmarks: A pilot study. *Journal of Speech, Language, and Hearing Research*, 55, 1655-1670. [https://doi.org/10.1044/1092-4388\(2012/11-0236\)](https://doi.org/10.1044/1092-4388(2012/11-0236))

Roberts, M. Y., & Kaiser, A. P. (2015). Early intervention for toddlers with language delays: A randomized controlled trial. *Pediatrics*, 135(4), 686-693.

<https://doi.org/10.1542/peds.2014-2134>

- Roberts, M. Y., Kaiser, A. P., Wolfe, C. E., Bryant, J. D., & Spidalieri, A. M. (2014). Effects of the teach-model-coach review instructional approach on caregiver use of language support strategies and children's expressive language skills. *Journal of Speech, Language and Hearing Research*, 57, 1851-1869.  
[https://doi.org/10.1044/2014\\_JSLHR-L-13-0113](https://doi.org/10.1044/2014_JSLHR-L-13-0113)
- Wake, M., Tobin, S., Girolametto, L., Ukoumunne, O. C., Gold, L., Levickis, P., Sheehan, J., Goldfeld, S., & Reilly, S. (2011). Outcomes of population based language promotion for slow to talk toddlers at ages 2 and 3 years: Let's Learn Language cluster randomized controlled trial. *BMJ* 2011; 343:d4741.  
<https://doi.org/10.1136/bmj.d4741>
- Warren, S. F., & Kaiser, A. P. (1986). Generalization of treatment effects by young language-delayed children: A longitudinal analysis. *Journal of Speech and Hearing Disorders*, 51, 239-251. <https://doi.org/10.1044/jshd.5103.239>
- Whitehurst, G. J., Fischel, J. E., Lonigan, C. J., Valdez-Menchaca, M. C., Arnold, D. S., & Smith, M. (1991). Treatment of early expressive language delay: If, when, and how. *Topics in Language Disorders*, 11(4), 55-68. <https://doi.org/10.1097/00011363-199111040-00008>
- Wilcox, M. J., Kouri, T. A., & Caswell, S. B. (1991). Early language intervention: A comparison of classroom and individual treatment. *American Journal of Speech-Language Pathology*, 1(1), 49-62. <https://doi.org/10.1044/1058-0360.0101.49>
- Wolfe, D. L., & Heilmann, J. (2010). Simplified and expanded input in a focused stimulation program for a child with expressive language delay (ELD). *Child Language Teaching and Therapy*, 26(3), 335-346. <https://doi.org/10.1177/0265659010369286>
