# Supplementary material
Source: publisher figshare collection journal article supplement (https://asha.figshare.com/articles/dataset/_/21291405)
Supplement: Supplementary file 4 [file 1]

## Supplemental Material S2. Data extraction categories.

| Data Category               | Data extracted                                                                                                                                                                                                                                                                                                                                                                                                                                                                                                                                                                                                                                                                                                                       |
|-----------------------------|--------------------------------------------------------------------------------------------------------------------------------------------------------------------------------------------------------------------------------------------------------------------------------------------------------------------------------------------------------------------------------------------------------------------------------------------------------------------------------------------------------------------------------------------------------------------------------------------------------------------------------------------------------------------------------------------------------------------------------------|
| Study characteristics       | <ul style="list-style-type: none"> <li>• Year published</li> <li>• Journal name</li> <li>• Country of study origin</li> <li>• Number of participants</li> </ul>                                                                                                                                                                                                                                                                                                                                                                                                                                                                                                                                                                      |
| Participant characteristics | <ul style="list-style-type: none"> <li>• Age, mean age per study, age bracket (18-30 months; 31-42 months; 18-42 months)</li> <li>• Sex (female participants only, male participants only, female and male participants)</li> <li>• Language spoken</li> <li>• Socioeconomic Status (range reported included low only, low–middle, middle only, middle–high, low–high)</li> <li>• Family history of language delay (history / no history)</li> <li>• Expressive language delay<sup>1</sup></li> <li>• Receptive language delay<sup>1</sup></li> <li>• Speech delay<sup>1</sup></li> <li>• Behaviour concerns<sup>1</sup></li> <li>• Delayed symbolic behaviour skills<sup>1</sup></li> </ul>                                         |
| Research Rigor              | <ul style="list-style-type: none"> <li>• Research design (randomized controlled trial [RCT], cluster randomized controlled trial, pre-post between group design with controls, pre-post within group design, single-case experimental design [SCED]) and ASHA quality rating score</li> </ul>                                                                                                                                                                                                                                                                                                                                                                                                                                        |
| Intervention approach       | <ul style="list-style-type: none"> <li>• Direct (i.e., interventionist, usually a clinician, working directly with a child on specific targets)</li> <li>• Indirect (i.e., coaching another person, usually caregiver, working with the child in naturalistic activities without specific targets)</li> <li>• Hybrid (i.e., both a clinician working directly with the child and another, usually parent, being coached to work with the child on specific targets in naturalistic contexts)</li> </ul>                                                                                                                                                                                                                              |
| Intervention description    | <ul style="list-style-type: none"> <li>• Intervention name (if provided) and description</li> </ul>                                                                                                                                                                                                                                                                                                                                                                                                                                                                                                                                                                                                                                  |
| Intervention elements       | <ul style="list-style-type: none"> <li>• Format: individual, group, individual and group</li> <li>• Setting: home, clinic, preschool, school, classroom, hospital, day care, community centre</li> <li>• Interventionist: clinician, student clinician, parent/caregiver, educator, early childhood special educator, special education student, psychologist, communication disorders assistant, nursery worker.</li> <li>• Targets: no specific child target, vocabulary targets (yes/no), other targets</li> <li>• Intervention intensity: session duration, session frequency, total number of sessions, and total intervention period.</li> <li>• Inclusion of home practice</li> <li>• Inclusion of parent training</li> </ul> |
| Outcome tools and measures  | <ul style="list-style-type: none"> <li>• Outcome measurement tool: parent-reported tool (e.g., vocabulary survey), language sample, direct assessment using a standardized test, informal (or experimenter) probe.</li> </ul>                                                                                                                                                                                                                                                                                                                                                                                                                                                                                                        |

|                |                                                                                                                                                                                                          |
|----------------|----------------------------------------------------------------------------------------------------------------------------------------------------------------------------------------------------------|
|                | <ul style="list-style-type: none"><li>• Outcome measure: raw score, transformed score (e.g., standard score, percentile rank, age equivalence measure)</li></ul>                                         |
| Study findings | <ul style="list-style-type: none"><li>• Outcome: improvement or no improvement in expressive vocabulary; improvement or no improvement in receptive vocabulary; summary description of result.</li></ul> |

<sup>1</sup> Categorized as reported delay or no delay. If information for a data extraction category was not reported in a study, this was coded in as "NR" (not reported).
